# Supplementary material
Source: PubMed Central journal article supplement (PMC5786275)
Supplement: NIHMS871980-supplement-supplement_1.pdf [file NIHMS871980-supplement-supplement_1.pdf]

**ONLINE APPENDIX: Additional Tables**

**Table A1. Summary Statistics, Harvard Medical School vs. Attendees**

| Sample Means                            | <i>HMS</i>      | <i>Attendees</i> | <i>Difference</i>   |
|-----------------------------------------|-----------------|------------------|---------------------|
|                                         | <i>Profiles</i> |                  |                     |
| Degree                                  |                 |                  |                     |
| MD                                      | 0.604           | 0.572            | 0.031               |
| PhD                                     | 0.382           | 0.493            | -0.111**            |
| Publications                            | 17.837          | 22.169           | -4.332 <sup>+</sup> |
| Rank                                    |                 |                  |                     |
| Professor                               | 0.061           | 0.037            | 0.024*              |
| Associate Professor                     | 0.066           | 0.157            | -0.091**            |
| Assistant Professor                     | 0.108           | 0.204            | -0.096**            |
| Instructor                              | 0.278           | 0.331            | -0.052*             |
| Postdoc/Fellow                          | 0.401           | 0.219            | 0.182**             |
| Other                                   | 0.086           | 0.052            | 0.034*              |
| Longwood                                | 0.619           | 0.510            | 0.109**             |
| Hospital                                |                 |                  |                     |
| Beth Israel Deaconess<br>Medical Center | 0.128           | 0.139            | -0.011              |
| Massachusetts General                   | 0.245           | 0.371            | -0.125**            |
| Brigham and Women's                     | 0.201           | 0.184            | 0.017               |
| Children's Hospital                     | 0.120           | 0.129            | -0.009              |
| Radiology Department                    | 0.054           | 0.266            | -0.213**            |
| Observations                            | 22,625          | 402              |                     |

*Notes:* See Section III in the text for a description of the data. Stars indicate the results of t-tests for equality of means. <sup>+</sup>  $p < 0.10$ , \*  $p < 0.05$ , \*\*  $p < 0.01$ .

**Table A2. Main effect of Treatment on Collaboration – Estimated with Probit**

| DV = Collaboration         | (1)                 | (2)                 | (3)                  |
|----------------------------|---------------------|---------------------|----------------------|
| Same room                  | 0.0011 <sup>+</sup> | 0.0011 <sup>+</sup> | 0.0012 <sup>*</sup>  |
|                            | (0.0006)            | (0.0006)            | (0.0005)             |
| One postdoc                |                     |                     | -0.0008              |
|                            |                     |                     | (0.0006)             |
| Both postdocs              |                     |                     | -0.0019              |
|                            |                     |                     | (0.0017)             |
| One is female              |                     |                     | 0.0002               |
|                            |                     |                     | (0.0006)             |
| Both are female            |                     |                     | 0.0006               |
|                            |                     |                     | (0.0009)             |
| Same hospital              |                     |                     | 0.0030 <sup>**</sup> |
|                            |                     |                     | (0.0006)             |
| Both Longwood              |                     |                     | 0.0001               |
|                            |                     |                     | (0.0006)             |
| One imager + one clinician |                     |                     | 0.0012               |
|                            |                     |                     | (0.0007)             |
| Both imagers               |                     |                     | 0.0022 <sup>**</sup> |
|                            |                     |                     | (0.0008)             |
| Same clinical area (SOI)   |                     |                     | 0.0026 <sup>**</sup> |
|                            |                     |                     | (0.0006)             |
| Previous coauthor          |                     |                     | 0.0079 <sup>**</sup> |
|                            |                     |                     | (0.0016)             |
| Night fixed effects        | No                  | Yes                 | Yes                  |
| Pseudo R2                  | 0.004               | 0.008               | 0.155                |
| Nb. of Obs.                | 26,664              | 26,664              | 26,664               |

*Notes:* The unit of analysis is a dyad of researchers. We construct dyads by creating every

possible pairwise combination of researchers attending on the same night (26,604 dyads). The

dependent variable is *Collaboration*, an indicator variable for whether the pair appeared on any common pilot grant or concept award applications. The main variable of interest is *Same room*, which was randomized across pairs attending on the same night. All estimation is by probit, reporting marginal effects. Robust standard errors in parentheses. <sup>+</sup>  $p < 0.10$ , \*  $p < 0.05$ , \*\*  $p < 0.01$

**Table A3. Treatment and Interactions with Measures of Distance – Estimated with Probit**

|                         | (1)      | (2)      | (3)      | (4)      | (5)      | (6)      | (7)                 | (8)      |
|-------------------------|----------|----------|----------|----------|----------|----------|---------------------|----------|
| Same room               | 0.0005   | -0.0001  | 0.0013   | 0.0014*  | 0.0020   | 0.0000   | 0.0010 <sup>+</sup> | -0.0002  |
|                         | (0.0007) | (0.0008) | (0.0008) | (0.0007) | (0.0013) | (0.0007) | (0.0006)            | (0.0018) |
| One postdoc             | -0.0021* |          |          |          |          |          |                     | -0.0015* |
|                         | (0.0009) |          |          |          |          |          |                     | (0.0008) |
| Same rm X One postdoc   | 0.0020   |          |          |          |          |          |                     | 0.0018   |
|                         | (0.0013) |          |          |          |          |          |                     | (0.0012) |
| Both postdocs           | -0.0023  |          |          |          |          |          |                     | -0.0013  |
|                         | (0.0018) |          |          |          |          |          |                     | (0.0017) |
| Same rm X Both postdocs | n/a      |          |          |          |          |          |                     | n/a      |
|                         | n/a      |          |          |          |          |          |                     | n/a      |
| One is female           |          | -0.0009  |          |          |          |          |                     | -0.0004  |
|                         |          | (0.0007) |          |          |          |          |                     | (0.0007) |
| Same rm X One female    |          | 0.0019   |          |          |          |          |                     | 0.0020   |
|                         |          | (0.0012) |          |          |          |          |                     | (0.0013) |
| Both are female         |          | -0.0009  |          |          |          |          |                     | -0.0003  |
|                         |          | (0.0014) |          |          |          |          |                     | (0.0013) |
| Same rm X Both female   |          | 0.0029   |          |          |          |          |                     | 0.0021   |
|                         |          | (0.0020) |          |          |          |          |                     | (0.0019) |
| Same hospital           |          |          | 0.0037** |          |          |          |                     | 0.0030** |
|                         |          |          | (0.0008) |          |          |          |                     | (0.0007) |
| Same rm X Same hospital |          |          | -0.0003  |          |          |          |                     | 0.0003   |
|                         |          |          | (0.0011) |          |          |          |                     | (0.0011) |
| Both Longwood           |          |          |          | 0.0005   |          |          |                     | 0.0005   |
|                         |          |          |          | (0.0007) |          |          |                     | (0.0007) |
| Same rm X Both Longwood |          |          |          | -0.0017  |          |          |                     | -0.0015  |
|                         |          |          |          | (0.0014) |          |          |                     | (0.0014) |

|                            |        |        |        |        |        |                      |                      |                      |
|----------------------------|--------|--------|--------|--------|--------|----------------------|----------------------|----------------------|
| One imager + one clinician |        |        |        |        |        | 0.0017 <sup>+</sup>  |                      | 0.0016 <sup>+</sup>  |
|                            |        |        |        |        |        | (0.0010)             |                      | (0.0010)             |
| Same rm X One imager       |        |        |        |        |        | -0.0010              |                      | -0.0011              |
|                            |        |        |        |        |        | (0.0015)             |                      | (0.0015)             |
| Both imagers               |        |        |        |        |        | 0.0034 <sup>**</sup> |                      | 0.0029 <sup>**</sup> |
|                            |        |        |        |        |        | (0.0011)             |                      | (0.0011)             |
| Same rm X Both imager      |        |        |        |        |        | -0.0014              |                      | -0.0019              |
|                            |        |        |        |        |        | (0.0016)             |                      | (0.0016)             |
| Same clinical area (SOI)   |        |        |        |        |        | 0.0021 <sup>**</sup> |                      | 0.0016 <sup>*</sup>  |
|                            |        |        |        |        |        | (0.0008)             |                      | (0.0008)             |
| Same rm X Same clin area   |        |        |        |        |        | 0.0026 <sup>*</sup>  |                      | 0.0028 <sup>*</sup>  |
|                            |        |        |        |        |        | (0.0012)             |                      | (0.0012)             |
| Previous coauthor          |        |        |        |        |        |                      | 0.0096 <sup>**</sup> | 0.0071 <sup>**</sup> |
|                            |        |        |        |        |        |                      | (0.0019)             | (0.0017)             |
| Same rm X Prev coauthor    |        |        |        |        |        |                      | 0.0038               | 0.0043               |
|                            |        |        |        |        |        |                      | (0.0035)             | (0.0032)             |
| Night fixed effects        | Yes    | Yes    | Yes    | Yes    | Yes    | Yes                  | Yes                  | Yes                  |
| Pseudo R2                  | 0.027  | 0.014  | 0.069  | 0.001  | 0.001  | 0.045                | 0.061                | 0.175                |
| Nb. of Obs.                | 26,184 | 26,664 | 26,664 | 26,664 | 26,664 | 26,664               | 26,664               | 26,184               |

*Notes:* The unit of analysis is a dyad of researchers. We construct dyads by creating every possible pairwise combination of researchers attending on the same night (26,604 dyads). The dependent variable is *Collaboration*, an indicator variable for whether the pair appeared on any common pilot grant or concept award applications. The main variable of interest is *Same room*, which was randomized across pairs attending on the same night. All estimation is by probit, reporting marginal effects. Robust standard errors in parentheses. <sup>+</sup>  $p < 0.10$ , <sup>\*</sup>  $p < 0.05$ , <sup>\*\*</sup>  $p < 0.01$

**Table A4. Application quality for within-rooms and across-rooms proposals**

| Sample Means                                         | <i>Collaborations</i> | <i>Collaborations</i> | <i>Difference</i> |
|------------------------------------------------------|-----------------------|-----------------------|-------------------|
|                                                      | <i>Within rooms</i>   | <i>Across rooms</i>   |                   |
| Application quality<br>(scores from the peer review) | 3.91                  | 4.00                  | -0.0912           |
| Observations                                         | 17                    | 30                    |                   |

*Notes:* The unit of analysis is a dyad of researchers. We construct dyads by creating every possible pairwise combination of researchers attending on the same night (26,604 dyads) but here we focus on researchers who attend on the same night and appeared on a common pilot grant (47 dyads). Stars indicate the results of t-tests for equality of means. <sup>+</sup>  $p < 0.10$ , <sup>\*</sup>  $p < 0.05$ , <sup>\*\*</sup>  $p < 0.01$
